# Supplementary material
Source: Springer Nature journal article supplement (https://www.springermedizin.de/resource/supplementary/13643_2013_223_MOESM10_ESM.pdf/9681846)
Supplement: MOESM10 [file 9681846]

Additional file 10. *Additional data used for calculations or not reported in the main report*

| Outcome                                                                  | Follow up | BI<br>Mean (SD) |             | No BI<br>Mean (SD) |             | Notes                                                                        |
|--------------------------------------------------------------------------|-----------|-----------------|-------------|--------------------|-------------|------------------------------------------------------------------------------|
|                                                                          |           | Baseline        | Follow-up   | Baseline           | Follow-up   |                                                                              |
| <b>PRIMARY OUTCOMES</b>                                                  |           |                 |             |                    |             |                                                                              |
| <b>Frequency of use</b>                                                  |           |                 |             |                    |             |                                                                              |
| <b>Days of use – Cannabis</b><br>Self-report, past 30 d [1]              | 1 mo      | 17.4 (11.5)     | 13.7 (11.9) | 19.1 (11.1)        | 13.0 (12.9) | Change from baseline in Table 5                                              |
|                                                                          | 3 mo      | 17.4 (11.5)     | 14.8 (12.1) | 19.1 (11.1)        | 13.2 (12.4) |                                                                              |
| <b>Days of use - Other drugs</b><br>Self-report, past 30 d. [1]          | 1 mo      | 6.4 (8.6)       | 4.1 (5.9)   | 5.6 (8.3)          | 2.6 (3.8)   | Change from baseline in Table 5                                              |
|                                                                          | 3 mo      | 6.4 (8.6)       | 3.6 (5.6)   | 5.6 (8.3)          | 3.3 (5.9)   |                                                                              |
| <b>Days abstinent</b><br>Self-report, past 30 d. [1]                     | 1 mo      | 8.7 (8.9)       | 12.4 (10.6) | 9.2 (9.8)          | 15.6 (12.1) | Change from baseline in Table 5                                              |
|                                                                          | 3 mo      | 8.7 (8.9)       | 11.4 (10.4) | 9.2 (9.8)          | 15.2 (11.8) |                                                                              |
| <b>Composite outcome</b>                                                 |           |                 |             |                    |             |                                                                              |
| <b>ASSIST Tool Score – All substances [2]</b>                            | 3 mo      | 36.7 (19.0)     | 28.9 (17.3) | 36.9 (20.1)        | 32.3 (17.9) | Change from baseline from Table 5 of main report                             |
| <b>ASSIST Tool Score – Cannabis [2]</b>                                  | 3 mo      | 17.6 (7.0)      | 13.9 (9.0)  | 17.8 (6.7)         | 15.7 (8.1)  | Additional information from original study report<br>BI: n=176; no BI: n=152 |
| <b>ASSIST Tool Score – Stimulants (amphetamine-type and cocaine) [2]</b> | 3 mo      | 17.3 (7.4)      | 11.1 (8.6)  | 15.3 (7.3)         | 12.1 (8.6)  | Additional information from original study report<br>BI: n=110; no BI: n=119 |
| <b>ASSIST Tool Score – Opioids [2]</b>                                   | 3 mo      | 22.7 (3.5)      | 21.9 (3.8)  | 13.1 (8.9)         | 16.3 (9.4)  | Additional information from original study report<br>BI: n=37; no BI: n=36   |
| <b>ASSIST Tool Score – Inhalants [2]</b>                                 | 3 mo      | 4.9 (5.3)       | 2.8 (2.7)   | 5.7 (6.9)          | 3.7 (7.1)   | Additional information from original study report<br>BI: n=28; no BI: n=19   |
| <b>ASSIST Tool Score – Sedatives [2]</b>                                 | 3 mo      | 8.8 (6.9)       | 2.9 (6.0)   | 10.0 (8.9)         | 4.3 (6.5)   | Additional information from original study report                            |

|                                                                        |       |                               |            |                                                |            |                                                                            |
|------------------------------------------------------------------------|-------|-------------------------------|------------|------------------------------------------------|------------|----------------------------------------------------------------------------|
|                                                                        |       |                               |            |                                                |            | BI: n=44; no BI: n=46                                                      |
| <b>ASSIST Tool Score – Hallucinogens [2]</b>                           | 3 mo  | 4.7 (4.7)                     | 2.1 (3.0)  | 5.2 (4.3)                                      | 2.2 (2.2)  | Additional information from original study report<br>BI: n=39; no BI: n=37 |
| <b>SECONDARY OUTCOMES</b>                                              |       |                               |            |                                                |            |                                                                            |
| <b>Other health measures</b>                                           |       |                               |            |                                                |            |                                                                            |
| <b>Use of drop-in centre services</b><br>Objective, past 30 d. [1]     | 1 mo  | 5.5 (5.4)                     | 6.4 (6.5)  | 6.3 (5.4)                                      | 6.1 (5.7)  | Change from baseline in Table 5                                            |
|                                                                        | 3 mo  | 5.5 (5.4)                     | 4.4 (6.1)  | 6.3 (5.4)                                      | 5.3 (6.8)  | Change from baseline in Table 5                                            |
| <b>Use of drop-in additional services</b><br>Objective, past 30 d. [1] | 1 mo  | 0.5 (1.1)                     | 0.5 (1.0)  | 0.5 (0.9)                                      | 1.0 (2.4)  | Change from baseline in Table 5                                            |
|                                                                        | 3 mo  | 0.5 (1.1)                     | 0.6 (1.4)  | 0.5 (0.9)                                      | 0.4 (0.9)  | Change from baseline in Table 5                                            |
| <b>Use of other agency services</b><br>Self-report, past 30 d. [1]     | 1 mo  | 11.8 (19.2)                   | 9.4 (12.4) | 16.5 (23.3)                                    | 9.5 (14.7) | Change from baseline in Table 5                                            |
|                                                                        | 3 mo  | 11.8 (19.2)                   | 8.4 (10.7) | 16.5 (23.3)                                    | 8.3 (10.5) | Change from baseline in Table 5                                            |
|                                                                        |       | <b>BI<br/>Event rates (n)</b> |            | <b>Written information<br/>Event rates (n)</b> |            |                                                                            |
| <b>Substance use</b>                                                   |       |                               |            |                                                |            |                                                                            |
| Abstinence – Sedatives or hypnotics [3]                                | 3 mo  | 18.5 % (27)                   |            | 0% (28)                                        |            | Sample sizes and group event rates provided by the author.                 |
|                                                                        | 12 mo | 25.9% (27)                    |            | 17.9% (28)                                     |            | Sample sizes and group event rates provided by the author.                 |
| Abstinence – Opioids [3]                                               | 3 mo  | 14.7% (34)                    |            | 12.0% (50)                                     |            | Sample sizes and group event rates provided by the author.                 |
|                                                                        | 12 mo | 20.6% (34)                    |            | 18% (50)                                       |            | Sample sizes and group event rates provided by                             |

|                                                               |       |                         |             |                                          |             |                                                            |
|---------------------------------------------------------------|-------|-------------------------|-------------|------------------------------------------|-------------|------------------------------------------------------------|
|                                                               |       |                         |             |                                          |             | the author.                                                |
| <b>Reducing use &gt;25% - Sedatives or hypnotics [3]</b>      | 3 mo  | 59.5% (27)              |             | 35.7% (28)                               |             | Sample sizes and group event rates provided by the author. |
|                                                               | 12 mo | 66.7% (27)              |             | 50.0% (28)                               |             | Sample sizes and group event rates provided by the author. |
| <b>Reducing use &gt;25% - Opioids [3]</b>                     | 3 mo  | 55.9% (34)              |             | 28.0% (50)                               |             | Sample sizes and group event rates provided by the author. |
|                                                               | 12 mo | 47.1% (34)              |             | 44.0% (50)                               |             | Sample sizes and group event rates provided by the author. |
|                                                               |       | <b>BI<br/>Mean (SD)</b> |             | <b>Written Information<br/>Mean (SD)</b> |             |                                                            |
|                                                               |       | Baseline                | Follow-up   | Baseline                                 | Follow-up   |                                                            |
| <b>Frequency of use</b>                                       |       |                         |             |                                          |             |                                                            |
| <b>Cannabis consumption [4]</b>                               | 3 mo  | 19.1 (11.2)             | 14.2 (10.8) | 14.5 (9.7)                               | 13.7 (11.2) | Change from baseline in Table 6                            |
|                                                               | 12 mo | 18.1 (10.8)             | 11 (10.7)   | 15.0 (10.4)                              | 13.2 (11.7) | Change from baseline in Table 6                            |
| <b>Quantity of use</b>                                        |       |                         |             |                                          |             |                                                            |
| <b>Defined daily dosage – Sedatives/hypnotics/opioids [3]</b> | 3 mo  | NR                      | NR          | NR                                       | NR          | Only change from baseline reported (Table 6).              |
| <b>Drug level – Cocaine (ng/10mg) [5]</b>                     | 6 mo  | 616 (NR)                | 436 (NR)    | 485 (NR)                                 | 464 (NR)    | Change from baseline in Table 6                            |
| <b>Drug level – Opioids (ng/10mg) [5]</b>                     | 6 mo  | 26.4 (NR)               | 18.8 (NR)   | 30.7 (NR)                                | 22.9 (NR)   | Change from baseline in Table 6                            |

## References

1. Baer JS, Garrett SB, Beadnell B, Wells EA, Peterson PL: **Brief motivational intervention with homeless adolescents: evaluating effects on substance use and service utilization.** *Psychol Addict Behav* 2007, **21**(4):582-586.
2. Humeniuk R, Dennington V, Ali R: *The Effectiveness of a Brief Intervention for Illicit Drugs Linked to the Alcohol, Smoking and Substance Involvement Screening Test (ASSIST) in Primary Health Care Settings: A Technical Report of Phase III Findings of the WHO ASSIST Randomized Controlled Trial.* World Health Organization; 2008.
3. Zahradnik A, Otto C, Crackau B, Lohrmann I, Bischof G, John U, Rumpf HJ: **Randomized controlled trial of a brief intervention for problematic prescription drug use in non-treatment-seeking patients.** *Addiction* 2009, **104**(1):109-117.
4. Bernstein E, Edwards E, Dorfman D, Heeren T, Bliss C, Bernstein J: **Screening and brief intervention to reduce marijuana use among youth and young adults in a pediatric emergency department.** *Academic emergency medicine : official journal of the Society for Academic Emergency Medicine* 2009, **16**(11):1174-1185.
5. Bernstein J, Bernstein E, Tassiopoulos K, Heeren T, Levenson S, Hingson R: **Brief motivational intervention at a clinic visit reduces cocaine and heroin use.** *Drug and Alcohol Dependence* 2005, **77**(1):49-59.
